# Supplementary material for: In2O3/AgBiS2 heterojunction – gated organic photoelectrochemical transistor with DNAzyme-mediated reaction for sensitive detection of bisphenol A
Source: Royal Society of Chemistry journal article supplement (doi:10.1039/d6ra02509a), 2026-05-08
Supplement: d6ra02509a1.pdf [file d6ra02509a1.pdf]

## Supporting Information

# **In<sub>2</sub>O<sub>3</sub>/AgBiS<sub>2</sub> heterojunction – gated organic photoelectrochemical transistor with DNAzyme-mediated reaction for sensitive detection of bisphenol A**

Tingting Zhang,<sup>\*a,b</sup> Qiyue Tao,<sup>a</sup> Jiahe Chen,<sup>b</sup> Jia-Hao Chen,<sup>\*b</sup> Hong Zhou<sup>b</sup>, Zhijie Zhang<sup>a</sup>

<sup>a</sup> Jiangsu Provincial Key Laboratory for Chemistry of Low-Dimensional Materials, School of Chemistry and Chemical Engineering, Huaiyin Normal University, Huai'an, 223300, Jiangsu, China. E-mail: tingtingzhang@hytc.edu.cn.

<sup>b</sup> Key Laboratory of Optic-Electric Sensing and Analytical Chemistry for Life Science, MOE, College of Chemistry and Molecular Engineering, Qingdao University of Science and Technology, Qingdao, 266042, People's Republic of China. E-mail: cjh807757290@126.com

## Table of Contents

1. **Materials and Apparatus.**
2. **Figure S1** The transmission electron microscopy (TEM) characterization and elemental mapping images of the  $\text{In}_2\text{O}_3/\text{AgBiS}_2$  heterojunction nanomaterials.
3. **Figure S2** Circular dichroism spectroscopy.
4. **Figure S3** Optimization of pH.
5. **Figure S4** The fabrication schematic of the OECT device.
6. **Figure S5** The reproductivity of OPECT biosensor.
7. **Figure S6** The stability of OPECT biosensor from different batches.
8. **Table S1** Comparisons with other reported methods for the determination of BPA.
9. **Reference**

## Materials and Apparatus.

**Materials:** In(NO<sub>3</sub>)<sub>3</sub>·4H<sub>2</sub>O, NH<sub>3</sub>·H<sub>2</sub>O, AgNO<sub>3</sub>, N,N-Dimethylformamide, citric acid, BiCl<sub>3</sub>, ethanol were purchased from Macklin (Shanghai, China). Poly (3, 4-ethylenedioxythiophene)-poly (styrene sulfonate) (PEDOT: PSS, Clevios PH1000) was purchased from Heraeus. Ascorbic acid (AA), Phosphate buffered solutions (PBS) was purchased from G-Clone (Beijing) Biotechnology Co. Acrylamide Gel, ethidium bromide, N, N, N', N'-Tetramethyl ethylenediamine and All oligonucleotides were synthesized by Shanghai Sangong Biotechnology Co. All reagents are analytical grade and are used without further purification. All aqueous solutions were prepared from ultrapure water (Millipore, 18 MΩ cm).

H1(CCGGTGGGTGGAATCAGGGAGGGCGGGTGGGTCACGTGTTGTCTCTCTTAACC),

H2(CCACCGACCGGTGGGTGGGCGGGAGGGACTGGTTAAACAGAGAGACAACACGTG),

cDNA(NH<sub>2</sub>-TTTTTTTTCCACCGAGCCGGTCGAACCCACCGG),

Apt(CCGGTGGGTGGAA)

**Apparatus:** The crystal structure, morphological structure and elemental composition were analyzed by transmission electron microscope (TEM, JEM-2100PLUS, Japan), X-ray photoelectron spectroscopy (XPS, ESCALAB XI+, China). The PEC measurements were carried out with a three electrode-based electrochemical workstation (CHI 660E, Chenhua Instruments Co. Ltd., Shanghai). The OPECT currents are collected by the CHI 1232 electrochemical workstation (Nandaguang, Nanjing, China).

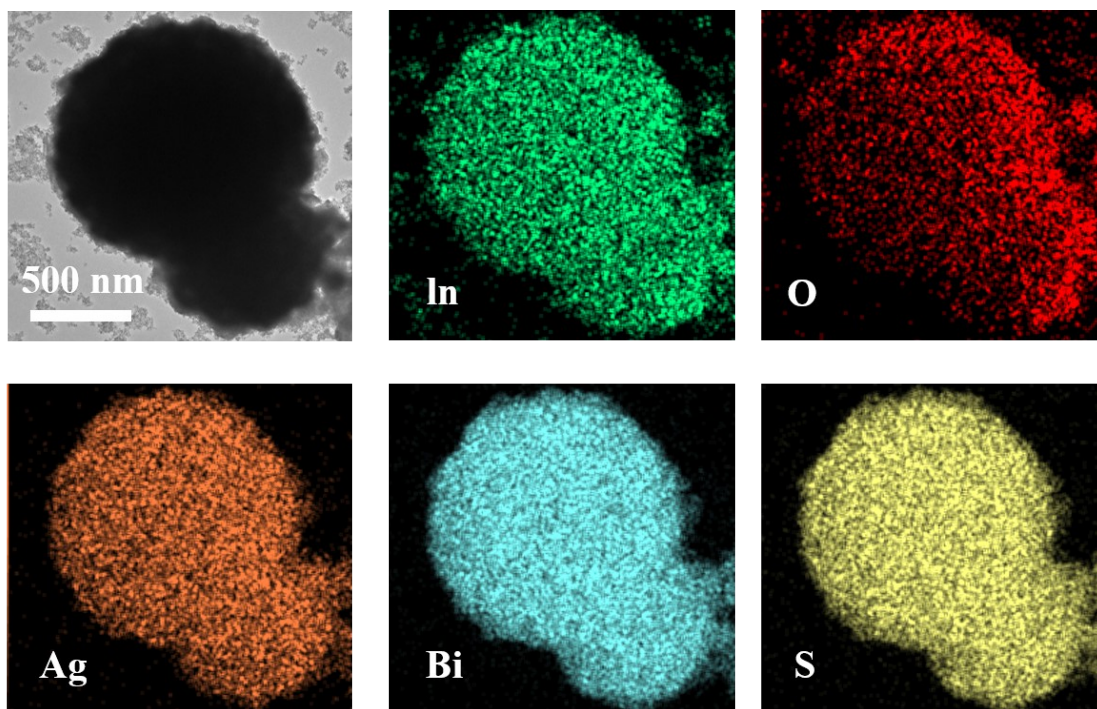

**Figure S1** The transmission electron microscopy (TEM) image and elemental mapping images of the In<sub>2</sub>O<sub>3</sub>/AgBiS<sub>2</sub> heterojunction nanomaterials.

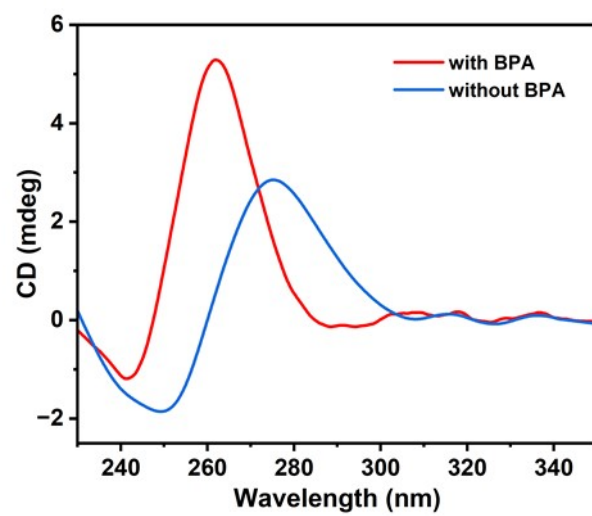

**Figure S2** Circular dichroism spectroscopy.

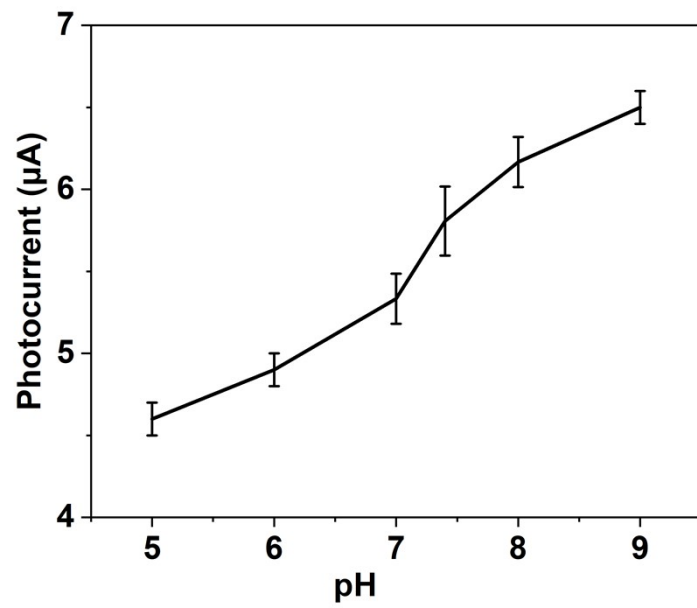

**Figure S3** Optimization of pH.

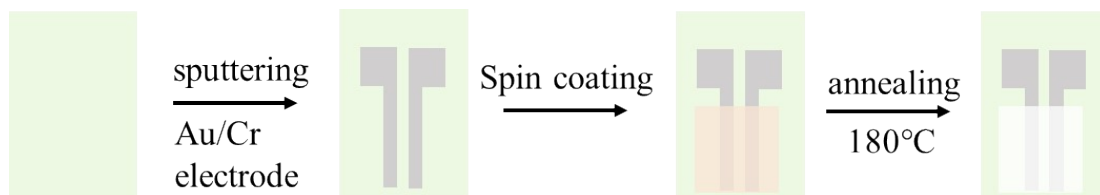

**Figure S4** The schematic illustration of the fabrication of the OECT device.

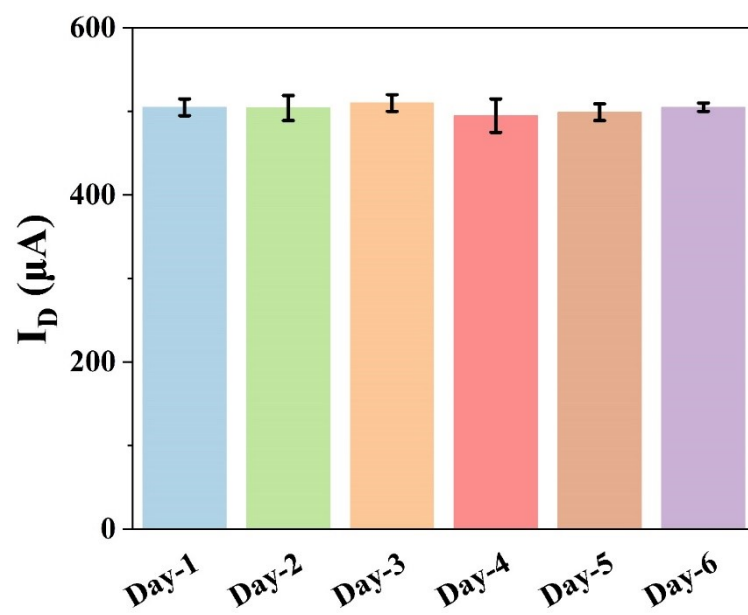

**Figure S5** The reproducibility of OPECT biosensor.

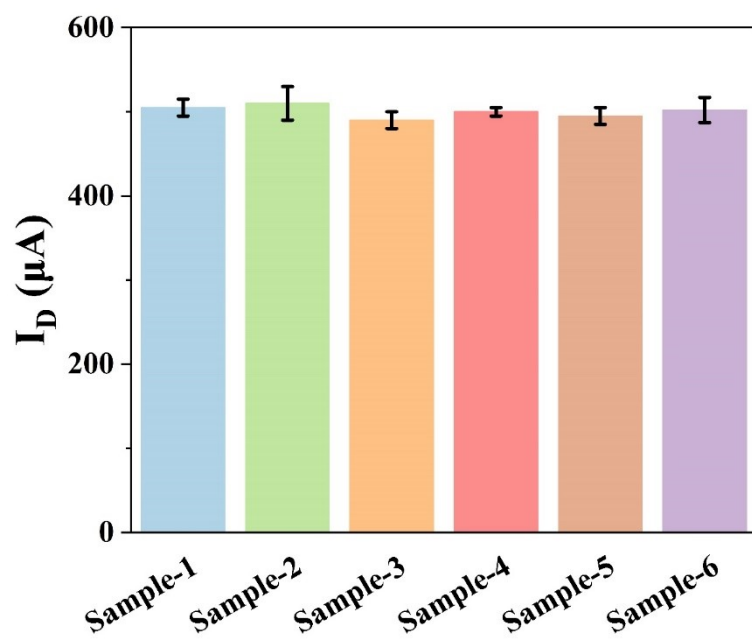

**Figure S6** The stability of OPECT biosensor from different batches.

**Table S1** Comparisons with other reported methods for the determination of BPA.

| <b>Method</b>                   | <b>Limit of detection</b> | <b>Linear Range</b>                             | <b>References</b> |
|---------------------------------|---------------------------|-------------------------------------------------|-------------------|
| <b>Fluorescence<sup>a</sup></b> | 7.11 $\mu\text{M}$        | 0 - 220 $\mu\text{M}$                           | 1                 |
| <b>LSV<sup>b</sup></b>          | 0.13 $\mu\text{M}$        | 0.5 - 160 $\mu\text{M}$                         | 2                 |
| <b>MIP<sup>c</sup></b>          | 0.015 nM                  | 0.05 - 50 nM                                    | 3                 |
| <b>SERS<sup>d</sup></b>         | 3.9 $\text{pg mL}^{-1}$   | 0.001 - 1 $\text{ng mL}^{-1}$                   | 4                 |
| <b>This work<sup>e</sup></b>    | 0.29 $\text{fg mL}^{-1}$  | 1 $\text{fg mL}^{-1}$ – 0.1 $\text{ng mL}^{-1}$ | -                 |

a: PBS/DMSO (1/1, v/v, pH = 7.4). b: pH 7.0, PBS buffer solution. c: pH = 7, PBS buffer solutions. d: Deionized water. e: pH = 7.4, PBS buffer solution.

## Reference

1. W. W. Sun, Y. F. Qi, L. Wang, Y. P. Tan, X. Zhang, J. F. Wang and Y. B. Li, *Spectrochim. Acta A Mol. Biomol. Spectrosc.*, 2025, **327**, 125318.
2. W. Liu, M. Y. Li, P. L. Zhang, H. M. Jiang, W. J. Liu, J. Y. Guan, Y. H. Sun, X. Y. Liu and Q. Zeng, *Mikrochim. Acta*, 2024, **191**, 309.
3. Y. Zhang, W. Zhang, L. Zhang, G. Song, N. Wang, W. Xu and W. Huang, *Microchem. J.*, 2021, **170**, 106737.
4. J. J. Feng, L. G. Xu, G. Cui, X. L. Wu, W. Ma, H. Kuang and C. L. Xu, *Biosens. Bioelectron.*, 2016, **81**, 138–142.
